# Supplementary material
Source: HighWire-hosted journal article supplement (https://www.cmajopen.ca/highwire/filestream/88579/field_highwire_adjunct_files/0/open-2021-0307-1-at.pdf)
Supplement: open-2021-0307-1-at.pdf [file open-2021-0307-1-at.pdf]

## Appendix 1: Supplemental tables

**Table S1- ICES Data Sources Used in this Study**

| Database name                                                                         |                                                                                                                                                                                                                                                                                                                                                                                                              |
|---------------------------------------------------------------------------------------|--------------------------------------------------------------------------------------------------------------------------------------------------------------------------------------------------------------------------------------------------------------------------------------------------------------------------------------------------------------------------------------------------------------|
| <b>Registered Persons Database (RPDB)</b>                                             | Contains demographic information about anyone who has ever received an Ontario health card number, i.e. all Ontarians alive at any time since 1990 (over 16 million records).(1)                                                                                                                                                                                                                             |
| <b>Ontario Health Insurance Plan (OHIP)</b>                                           | Contains information on all billing claims submitted by Ontario physicians (consultations and procedures). Fee for service is the primary method of remuneration for 95% of specialist physicians and 50% of primary care physicians in Ontario. However, physicians practicing in non fee-for-service models submit shadow billings to OHIP, which appear as billing claims with a payment value of \$0.(2) |
| <b>National Ambulatory Care Reporting System (NACRS)</b>                              | Includes information for all emergency department visits since 2000. A re- abstraction study of diagnostic codes found 85% agreement for the main presenting problem.(3)                                                                                                                                                                                                                                     |
| <b>Discharge Abstract Database (DAD)</b>                                              | Information on all admissions (excluding designated mental health beds) to acute care hospitals in Ontario. This includes dates of admission as well as diagnostic and procedural codes. Overall, diagnostic codes were found to be 82% sensitive for primary diagnosis when verified against chart abstraction.(4)                                                                                          |
| <b>Ontario Mental Health Reporting System (OMHRS)</b>                                 | Includes information on all admissions to designated adult inpatient mental health beds in Ontario.(5)                                                                                                                                                                                                                                                                                                       |
| <b>Home Care Database (HCD)</b>                                                       | Includes all publicly funded home care services, including the service type (end-of-life or not).(6)                                                                                                                                                                                                                                                                                                         |
| <b>Client Agency Program Enrolment Database (CAPE)</b>                                | Links physicians to their enrolled patients under several patient enrolment models of clinical practice. These funding models include enhanced fee for service, non-team capitation, and team-based capitation.(7)                                                                                                                                                                                           |
| <b>Immigration Refugees and Citizenship Canada Permanent Resident Database (IRCC)</b> | Contains information on immigrants who have landed in Ontario since 1985.(8)                                                                                                                                                                                                                                                                                                                                 |
| <b>Ontario Diabetes Dataset (ODD)</b>                                                 | Contains individuals in Ontario with any type of non-gestational diabetes identified since 1991. Combines data from OHIP, RPDB, ODB and DAD. When validated against clinical charts, this was 90% sensitive and 98% specific for a diagnosis of adult diabetes.(9)                                                                                                                                           |
| <b>Ontario Congestive Heart Failure (CHF) dataset</b>                                 | Contains all Ontario individuals with CHF identified since 1991. This dataset combines data from DAD, OMHRS, OHIP and NACRS. Among adults over age 40, sensitivity was 85% and specificity was 97% when validated against chart review.(10)                                                                                                                                                                  |
| <b>Ontario Chronic Obstructive Pulmonary Disease Cohort (COPD)</b>                    | Contains all Ontario COPD patients identified since 1991. This dataset combines data from DAD and OHIP. Among adults over age 35, sensitivity was 85% and specificity was 78% when validated against chart review.(11)                                                                                                                                                                                       |

|                                            |                                                                                                                                                                                                                                                                                                                                                                              |
|--------------------------------------------|------------------------------------------------------------------------------------------------------------------------------------------------------------------------------------------------------------------------------------------------------------------------------------------------------------------------------------------------------------------------------|
| <b>Ontario Dementia dataset (DEMENTIA)</b> | Includes all Ontario persons who were identified with Alzheimer’s and related dementias in ICES data holdings between the ages of 40 to 110 years. This dataset combines data from DAD, OHIP and prescribed medications from the Ontario Drug Benefit (ODB). Among adults over age 65, sensitivity was 79% and specificity was 99% when validated against chart review. (12) |
| <b>Ontario Asthma Cohort (ASTHMA)</b>      | Contains all Ontario asthma patients identified since 1991. Combines information from DAD and OHIP. In adults, 80% sensitive, 81% specific against chart review. (13) Among those under age 18, 89% sensitive, 72% specific against chart review. (14)                                                                                                                       |
| <b>MOMBABY dataset</b>                     | MOMBABY dataset links the DAD inpatient admission records of delivering mothers and their newborns. (15)                                                                                                                                                                                                                                                                     |

**Table S2A- Volume Incentive Thresholds for Physician Home visits-** applicable to physicians in patient enrolment models of care, for both enrolled and unenrolled patients – copied from Ministry of Health InfoBulletins.(16, 17)

| Bonus Level               | Home Visits                   |                               |                                |                                |
|---------------------------|-------------------------------|-------------------------------|--------------------------------|--------------------------------|
|                           | A                             | B                             | C                              | D                              |
| Necessary annual criteria | 3 or more patients served and | 6 or more patients served and | 17 or more patients served and | 32 or more patients served and |
|                           | 12 or more encounters         | 24 or more encounters         | 68 or more encounters          | 128 or more encounters         |
| Annual Bonus              | \$1,500                       | \$3,000                       | \$5,000                        | \$8,000                        |

**Table S2B- Volume Incentive Thresholds for Physician Home visits-** applicable to fee-for-service physicians– copied from Ministry of Health InfoBulletin.(18)

| Bonus Level               | Home Visits                   |                               |
|---------------------------|-------------------------------|-------------------------------|
|                           | A                             | B                             |
| Necessary annual criteria | 3 or more patients served and | 6 or more patients served and |
|                           | 12 or more encounters         | 24 or more encounters         |
| Annual Bonus              | \$1,500                       | \$3,000                       |

**Table S3- Codes Used to Identify Palliative Care and Not Palliative Home Visits. Home visits were first classified as palliative if any palliative codes were present.**

| Type of Home Visit                                                                   | Code                                                    | Descriptor of code                                                       |
|--------------------------------------------------------------------------------------|---------------------------------------------------------|--------------------------------------------------------------------------|
| <b>Palliative care</b>                                                               | B998                                                    | Palliative Home Visit-<br>Special visit premium daytime/evenings/weekend |
|                                                                                      | B997                                                    | Palliative Home Visit-<br>Special visit premium nights                   |
|                                                                                      | B966                                                    | Palliative Home Visit-<br>Travel premium                                 |
|                                                                                      | A945                                                    | GEN./FAM.PRACT.SPECIAL PALLIATIVE CARE<br>CONSULTATION                   |
|                                                                                      | A905                                                    | GENERAL/FAMILY PRACTICE-LIMITED CONSULTATION                             |
|                                                                                      | G512                                                    | Palliative care case management fee                                      |
|                                                                                      | K700                                                    | PALLIATIVE CARE OUT-PATIENT CASE CONFERENCE                              |
| <b>Not palliative</b><br>(used for home<br>care services group<br>and “other” group) | A902                                                    | House call-to pronounce death                                            |
|                                                                                      | A901                                                    | House call assessment (in FP/GP section)                                 |
|                                                                                      | A900                                                    | Complex house call assessment- for “frail elderly or<br>housebound”      |
|                                                                                      | B960, B990,<br>B961, B992                               | Home visit Special visit premiums daytime                                |
|                                                                                      | B962, B994,<br>B964, B996                               | Home visit Special visit premiums evenings and nights                    |
| B963, B993                                                                           | Home visit Special visit premiums Weekends and holidays |                                                                          |

**Table S4- Operational Definitions for all Variables**

| Variable                                                      | Data Source      | Definition                                                                                                                                                                                                                                                               |
|---------------------------------------------------------------|------------------|--------------------------------------------------------------------------------------------------------------------------------------------------------------------------------------------------------------------------------------------------------------------------|
| Home visit physician billing costs                            | OHIP             | Obtained from the monetary value (variable TOTPAID) of all billing codes from physician home visits.                                                                                                                                                                     |
| Age                                                           | RPDB             | Categorized as<br><18 years (children)<br>18-39 years (young adult)<br>40-64 years (middle aged)<br>65-79 years (younger seniors)<br>80+ years (older seniors)                                                                                                           |
| Sex                                                           | RPDB             | Male<br>Female                                                                                                                                                                                                                                                           |
| Residence setting                                             | RPDB             | Postal code converted to RIO score (19)<br>0-9 : large urban<br>10-39: small urban<br>40+: rural                                                                                                                                                                         |
| Neighborhood income quintile                                  | RPDB, Census     | Nearest census-based income quintile based on postal code (based on 2016 census).(20)                                                                                                                                                                                    |
| Comorbidity count                                             | DAD, NACRS, OHIP | Count of ACG System Aggregated Diagnosis Groups (ADGs), per the Johns Hopkins ACG® System Version 7, in 2 years prior to the index date.(21) Categorized as:<br>Low 0-5<br>Moderate 6-9<br>High 10+                                                                      |
| Healthcare Utilization                                        | DAD, NACRS, OHIP | Using Resource Utilization Bands (RUBs), per the Johns Hopkins ACG® System Version 7, in 2 years prior to the index date.(21) Categorized as:<br>Low (0-2)<br>Moderate (3)<br>High (4-5)                                                                                 |
| Pediatric Chronic Medical Condition (Pediatric subgroup only) | DAD              | For pediatric (under age 18 group), diagnostic code of a chronic medical condition or any procedure either inpatient or office, per the definition use by the Canadian Institute for Health Information.(22)                                                             |
| Recent emergency department visit                             | DAD              | At least one emergency department in the previous 30 days.                                                                                                                                                                                                               |
| Recent hospital discharge                                     | DAD              | Discharged from an acute care facility within the previous 30-day period.                                                                                                                                                                                                |
| Previous office physician visits                              | OHIP             | Count of all visits in previous year that occurred in an office setting (location="O"). Exclude codes that start with: X, J, L, E, Q0**, Q1**, Q2**. Combine all codes by same physician, on same day, with same patient into 1, to avoid double counting office visits. |
| Homecare service visits in previous month                     | HCD              | Number of home care visits in the 30 days before the home visit (restrict to only visits with CARESITE=21 (household).                                                                                                                                                   |

|                                                                   |                                  |                                                                                                                                                                                                                                                                                                         |
|-------------------------------------------------------------------|----------------------------------|---------------------------------------------------------------------------------------------------------------------------------------------------------------------------------------------------------------------------------------------------------------------------------------------------------|
| Dementia                                                          | DEMEN<br>TIA, RAI-<br>HC         | Code as 1 if either of:<br>- presence in “DEMENTIA” dataset at ICES.<br>- RAI-HC component (J1G or J1H)=yes in 5-year look-back from index date.                                                                                                                                                        |
| Mental health visits                                              | OHIP/N<br>ACRS/D<br>AD/OM<br>HRS | Coded as 1 if any admission, emergency department visits, or office visit for a mental health-related condition in previous 2 years. The detailed algorithm and codes used have been described elsewhere:<br>- ED/admissions using NACRS, DAD and OMHRS data(23)<br>- office visits using OHIP data(24) |
| Chronic obstructive pulmonary disease (COPD)                      | COPD                             | Presence in COPD database                                                                                                                                                                                                                                                                               |
| Congestive heart failure (CHF)                                    | CHF                              | Presence in CHF database                                                                                                                                                                                                                                                                                |
| Asthma                                                            | ASTHM<br>A                       | Presence in ASTHMA database                                                                                                                                                                                                                                                                             |
| Post-partum                                                       | MOMBA<br>BY                      | Presence in “MOM-BABY” dataset with baby date of birth up to 90 days before index home visit date. (B_BDATE-index date ≤ 90 days)<br>If yes then code as 1. Otherwise code as 0.                                                                                                                        |
| Diabetes                                                          | ODD                              | Presence in ODD                                                                                                                                                                                                                                                                                         |
| Limited proficiency in English or French                          | IRCC                             | CAN_LANG=4 in IRCC database                                                                                                                                                                                                                                                                             |
| Immigrant status                                                  | IRCC                             | Present in IRCC database(8)                                                                                                                                                                                                                                                                             |
| Primary care attachment                                           | CAPE,<br>OHIP                    | %getpcprovider macro using the methods described by Stukel et al.(25)<br>- formally enrolled(ROSTERED=1)<br>- other primary care physician (ROSTERED=2)<br>- no primary care (ROSTERED=0)                                                                                                               |
| Same as enrolled primary care provider                            | CAPE                             | %getpcprovider macro using the methods described by Stukel et al.(25)<br>Code as yes if the home visit MD is the same MD as enrolled MD ('ROSTERED'=1)                                                                                                                                                  |
| Another physician in same group as enrolled primary care provider | CAPE                             | Use macro %getpcprovider<br>If “ROSTERED”=1 then Compare patient’s enrolling “groupnum” to groupnum(s) of home visit physician on index date.<br>If patient rostered=1 and physnums are different, but groupnums are the same, then code as 1.                                                          |
| Either same as enrolled primary care provider or same group       | CAPE                             | Use macro %getpcprovider<br>If “ROSTERED”=1 then Compare patient’s enrolling “groupnum” to groupnum(s) of home visit physician on index date.<br>If patient rostered=1 and groupnum is the same code as 1                                                                                               |
| Known to patient from a visit in the previous year                | OHIP                             | Home visit MD had least 1 previous visit (in any setting) with this patient in the previous 365 days                                                                                                                                                                                                    |

|                                                                                           |        |                                                                                                                                                                                                                                                                                                                          |
|-------------------------------------------------------------------------------------------|--------|--------------------------------------------------------------------------------------------------------------------------------------------------------------------------------------------------------------------------------------------------------------------------------------------------------------------------|
| Repeat home visits in subsequent year                                                     | HCD    | Count of repeat home visits (combined multiple home visits in one day into one home visit) in subsequent 365 days after the first.                                                                                                                                                                                       |
| Repeat home visits with same MD in subsequent year                                        | OHIP   | Subsequent MD home visits with the same physician as the first home visit.                                                                                                                                                                                                                                               |
| Office visit within 30 days                                                               | OHIP   | Count of office physician visit in the <b>30 days</b> following the home visit- include the day of the home visit.<br><br>Code as office visit if there is at least one visit that is assigned to location = "O" (office), excluding OHIP codes starting with: X, J, L, E, Q0**, Q1**, Q2**                              |
| Emergency department visit within 30 days                                                 | NACRS  | Code as 1 if visit to the emergency department within 30 days of home visit. Start count on the day of the index home visit date                                                                                                                                                                                         |
| Urgent hospitalization within 30 days                                                     | DAD    | Code as 1 if urgent admission (ADMCAT="U") to an acute care hospital within 30 days of home visit. Start the count on the day of the index home visit date.                                                                                                                                                              |
| <b>Subgroup with RAI-HC completed within 6 months prior to index physician home visit</b> |        |                                                                                                                                                                                                                                                                                                                          |
| Hearing impaired                                                                          | RAI-HC | C1_RAIHC=(2 or 3) or D3=(2, 3, or 4)<br>Corresponds to "Hearing" is either "hears in special situations only" or "highly impaired"                                                                                                                                                                                       |
| Vision impaired                                                                           | RAI-HC | D1_RAIHC or D4=(2, 3, or 4)<br>Corresponds to "Vision" is "impaired" (sees large print only) or "moderately impaired" or "highly impaired" or "severely impaired"                                                                                                                                                        |
| Caregiver in home                                                                         | RAI-HC | Score as 1 if either (G1EA_RAIHC or G1EB_RAIHC)=0 (in form 0=yes)<br>Corresponds to "Informal helpers (primary and secondary)" and "lives with client" for each of "primary" and "secondary."                                                                                                                            |
| Assistive Device                                                                          | RAI-HC | Coded as 1 if (H4A or H4B) = (1,2,3,4)<br>Corresponds to "Primary modes of locomotion" any of: "cane", "walker/crutch", "scooter", or "wheelchair"                                                                                                                                                                       |
| Dependent on others for locomotion                                                        | RAI-HC | Not independent, if (G2f or H2C)=(1,2,3,4,5,6,8)<br>Corresponds to "Locomotion in home" within "ADL self-performance" anything other than "independent" (includes "setup help only", "supervision", limited assistance", "extensive assistance", "maximal assistance", "total dependence" and "activity did not occur"). |
| Homebound Status                                                                          | RAI-HC | Not homebound (0)= H6A ("Stamina-Days") is 0-1<br>Borderline homebound (1)= H6A ("Stamina-Days") is 2<br>Homebound (2)= H6A ("Stamina-Days") is 3 or G4b=0                                                                                                                                                               |

**Table S5- Top 10 Most Common Diagnoses Claimed for Home Visits to Patients in the Palliative Group**

| Diagnosis code | Description                                                | N (%)            |
|----------------|------------------------------------------------------------|------------------|
| 162            | Malignant neoplasm - bronchus, lung                        | 10,719 ( 13.6% ) |
| 199            | Other malignant neoplasms                                  | 5,508 ( 6.99% )  |
| 290            | Senile dementia, presenile dementia                        | 3,497 ( 4.44% )  |
| 428            | Congestive heart failure                                   | 3,388 ( 4.30% )  |
| 157            | Malignant neoplasm - pancreas                              | 3,330 ( 4.22% )  |
| 153            | Malignant neoplasm - large intestine, excluding rectum     | 3,325 ( 4.22% )  |
| 174            | Malignant neoplasm - female breast                         | 3,309 ( 4.20% )  |
| 185            | Malignant neoplasm - prostate                              | 2,461 ( 3.12% )  |
| 198            | Metastatic or secondary malignant neoplasm, carcinomatosis | 1,967 ( 2.50% )  |
| 799            | Other ill-defined conditions                               | 1,954 ( 2.48% )  |

**Table S6- Top 10 Most Common Diagnoses Claimed for Home Visits to Patients in the Homecare Recipient Group**

| Diagnosis code | Description                                                                                  | N (%)           |
|----------------|----------------------------------------------------------------------------------------------|-----------------|
| 290            | Senile dementia, presenile dementia                                                          | 8,693 ( 10.5% ) |
| 428            | Congestive heart failure                                                                     | 3,093 ( 3.72% ) |
| 401            | Essential, benign hypertension                                                               | 2,921 ( 3.51% ) |
| 799            | Other ill-defined conditions                                                                 | 2,785 ( 3.35% ) |
| 460            | Acute nasopharyngitis, common cold                                                           | 2,574 ( 3.09% ) |
| 250            | Diabetes mellitus, including complications                                                   | 2,483 ( 2.98% ) |
| 781            | Leg cramps, leg pain, muscle pain, joint pain, arthralgia, joint swelling, masses            | 2,308 ( 2.77% ) |
| 682            | Cellulitis, abscess                                                                          | 2,302 ( 2.77% ) |
| 300            | Anxiety neurosis, hysteria, neurasthenia, obsessive compulsive neurosis, reactive depression | 2,301 ( 2.77% ) |
| 466            | Acute bronchitis                                                                             | 2,208 ( 2.65% ) |

**Table S7- Top 10 Most Common Diagnoses Claimed for Home Visits to Patients in the “Other” group**

| Diagnosis code | Description                                                                                                                 | N (%)         |
|----------------|-----------------------------------------------------------------------------------------------------------------------------|---------------|
| 460            | Acute nasopharyngitis, common cold                                                                                          | 36,397 (14.5) |
| 466            | Acute bronchitis                                                                                                            | 11,825 (4.7)  |
| 300            | Anxiety neurosis, hysteria, neurasthenia, obsessive compulsive neurosis, reactive depression                                | 10,929 (4.3)  |
| 290            | Senile dementia, presenile dementia                                                                                         | 9,671 (3.8)   |
| 401            | Essential, benign hypertension                                                                                              | 7,398 (2.9)   |
| 787            | Anorexia, nausea and vomiting, heartburn, dysphagia, hiccup, hematemesis, jaundice, ascites, abdominal pain, melena, masses | 7,383 (2.9)   |
| 009            | Diarrhea, gastro-enteritis, viral gastro-enteritis                                                                          | 7,131 (2.8)   |
| 781            | Leg cramps, leg pain, muscle pain, joint pain, arthralgia, joint swelling, masses                                           | 6,356 (2.5)   |
| 079            | Other viral diseases                                                                                                        | 6,228 (2.5)   |
| 799            | Other ill-defined conditions                                                                                                | 6,042 (2.4)   |

**Table S8- Top 10 Most Common Diagnoses Claimed for Home Visits to Patients Under Age 18 in the “Other” group**

| Diagnosis code | Description                                                                                                                 | N (%)         |
|----------------|-----------------------------------------------------------------------------------------------------------------------------|---------------|
| 460            | Acute nasopharyngitis, common cold                                                                                          | 17,331 (32.8) |
| 079            | Other viral diseases                                                                                                        | 3,186 (6.0)   |
| 381            | Serous otitis media, eustachian tube disorders                                                                              | 2,745 (5.2)   |
| 009            | Diarrhea, gastro-enteritis, viral gastro-enteritis                                                                          | 2,488 (4.7)   |
| 466            | Acute bronchitis                                                                                                            | 1,865 (3.5)   |
| 382            | Suppurative otitis media                                                                                                    | 1,649 (3.1)   |
| 691            | Eczema, atopic dermatitis, neurodermatitis                                                                                  | 1,622 (3.1)   |
| 034            | Streptococcal sore throat, scarlet fever                                                                                    | 1,603 (3.0)   |
| 787            | Anorexia, nausea and vomiting, heartburn, dysphagia, hiccup, hematemesis, jaundice, ascites, abdominal pain, melena, masses | 1,599 (3.0)   |
| 463            | Acute tonsillitis                                                                                                           | 1,232 (2.3)   |

## References

1. Institute for Clinical Evaluative Sciences. Population and Demographic Data: RPDB. In; 2011.
2. ICES. Ontario Health Insurance Plan (OHIP). In. ICES Data Dictionary; 2017.
3. Canadian Institute for Health Information. CIHI Data Quality Study of Ontario Emergency Department Visits for Fiscal Year 2004–2005—Executive Summary. Ottawa; 2007.
4. Juurlink DN, Preyra C, Croxford R, Chong A, Austin PC, Tu JV, Laupacis A. Canadian Institute for Health Information Discharge Abstract Database: A Validation Study. Toronto, Ontario: Institute for Clinical Evaluative Sciences; 2006.
5. Canadian Institute for Health Information. Ontario Mental Health Reporting System Data Quality Documentation, 2019-2020. In. Ottawa, Ontario: CIHI; 2020.
6. Jones A, Schumacher C, Bronskill SE, Campitelli MA, Poss JW, Seow H, Costa AP. The association between home care visits and same-day emergency department use: a case-crossover study. *Cmaj* 2018;190:E525-e531.
7. Kiran T, Victor JC, Kopp A, Shah BR, Glazier RH. The relationship between financial incentives and quality of diabetes care in Ontario, Canada. *Diabetes Care* 2012;35:1038-1046.
8. Rezai M, Maclagan L, Donovan L, Tu JV. Classification of Canadian immigrants into visible minority groups using country of birth and mother tongue. *Open Medicine : A Peer-reviewed, Independent, Open-access Journal* 2013;7.
9. Lipscombe LL, Hwee J, Webster L, Shah BR, Booth GL, Tu K. Identifying diabetes cases from administrative data: a population-based validation study. *BMC Health Services Research* 2018;18:316.
10. Schultz SE, Rothwell DM, Chen Z, Tu K. Identifying cases of congestive heart failure from administrative data: a validation study using primary care patient records. *Chronic Dis Inj Can* 2013;33:160-166.
11. Gershon AS, Wang C, Guan J, Vasilevska-Ristovska J, Cicutto L, To T. Identifying individuals with physician diagnosed COPD in health administrative databases. *Copd* 2009;6:388-394.
12. Jaakkimainen RL, Bronskill SE, Tierney MC, Herrmann N, Green D, Young J, Ivers N, et al. Identification of Physician-Diagnosed Alzheimer's Disease and Related Dementias in Population-Based Administrative Data: A Validation Study Using Family Physicians' Electronic Medical Records. *J Alzheimers Dis* 2016;54:337-349.
13. Gershon AS, Wang C, Guan J, Vasilevska-Ristovska J, Cicutto L, To T. Identifying patients with physician-diagnosed asthma in health administrative databases. *Can Respir J* 2009;16:183-188.
14. To T, Dell S, Dick P, Cicutto L, MacLusky I, Tassoudji M, Harris JK. Defining asthma in children for surveillance. *Am J Respir Crit Care Med* 2004;169:A383.
15. Fitzpatrick T, Wilton AS, Guttman A. Development and validation of a simple algorithm to estimate common gestational age categories using standard administrative birth record data in Ontario, Canada. *J Obstet Gynaecol* 2021;41:207-211.
16. Ontario Ministry of Health and Long-Term Care. Home Visits Special Premium Payment and Reporting (CCM, FHG, FHN, FHO). In: INFOBulletin. Toronto, Ontario: Primary Health Care Branch; 2013.
17. Ontario Ministry of Health and Long-Term Care. Home Visits Special Premium Payment and Reporting (BSM, SJHC, WAHA, RNPGA, SEAMO, HIV, GHC). In: INFOBulletin. Toronto, Ontario: Primary Health Care Branch; 2013.
18. Ontario Ministry of Health and Long-Term Care. Home Visits Special Premium Payment and Reporting (FFS). In: INFOBulletin. Toronto, Ontario: Primary Health Care Branch; 2013.
19. Kralj B. Measuring Rurality - RIO2008\_BASIC: Methodology and Results In: OMA Economics Department, editor.; 2009.

20. Alter DA, Naylor CD, Austin P, Tu JV. Effects of Socioeconomic Status on Access to Invasive Cardiac Procedures and on Mortality after Acute Myocardial Infarction. *New England Journal of Medicine* 1999;341:1359-1367.
21. Johns Hopkins University. Johns Hopkins ACG Case-Mix Adjustment System. In.
22. Canadian Institute for Health Information. Children and Youth With Medical Complexity in Canada. Ottawa, ON; 2020.
23. Chiu M, Gatov E, Fung K, Kurdyak P, Guttman A. Deconstructing The Rise In Mental Health–Related ED Visits Among Children And Youth In Ontario, Canada. *Health Affairs* 2020;39:1728-1736.
24. Steele LS, Glazier RH, Lin E, Evans M. Using administrative data to measure ambulatory mental health service provision in primary care. *Med Care* 2004;42:960-965.
25. Stuke IT, Glazier RH, Schultz SE, Guan J, Zagorski BM, Gozdyra P, Henry DA. Multispecialty physician networks in Ontario. *Open Medicine : A Peer-reviewed, Independent, Open-access Journal* 2013.
